# Supplementary material for: Hydrothermal Hydrolysis of Cocoa Bean Shell to Obtain Bioactive Compounds
Source: MDPI journal article supplement (doi:10.3390/pr12050956), 2024-05-08
Supplement: s1 [file s1]

# Supplementary Materials

**Table S1.** Values of different bioactive compounds analysed in broths at pH 2.

| Component                          | 0 min        | 3 min       | 5 min        | 7 min       | 10 min       | 13 min       |
|------------------------------------|--------------|-------------|--------------|-------------|--------------|--------------|
| Antioxidant activity (µM TE/g CBS) | 43.9 ± 0.1a  | 99.8 ± 0.8b | 102.2 ± 1.2b | 97.9 ± 0.7b | 96.8 ± 0.5b  | 101.1 ± 0.4b |
| TPC (mg GAE/g CBS)                 | 4.1 ± 0.1a   | 7.1 ± 0.1b  | 7.3 ± 0.1b   | 8.1 ± 0.1b  | 9.5 ± 0.1c   | 9.1 ± 0.1c   |
| TFC (mg CE/g CBS)                  | 2.1 ± 0.2a   | 2.5 ± 0.01a | 4.1 ± 0.2b   | 3.9 ± 0.1b  | 6.3 ± 0.2c   | 6.2 ± 0.2c   |
| TTC (mg CE/g CBS)                  | 1.4 ± 0.05a  | 5.4 ± 0.2b  | 5.1 ± 0.01b  | 4.8 ± 0.2b  | 5.6 ± 0.1b   | 5.1 ± 0.1b   |
| TSC (mg EE/g CBS)                  | 16.1 ± 0.1a  | 31.5 ± 0.1b | 30.9 ± 0.01b | 32.1 ± 0.1b | 35.6 ± 0.6b  | 32.2 ± 0.8b  |
| Catechin (mg/g CBS)                | 0.03 ± 0.2a  | 0.07 ± 0.3b | 0.07 ± 0.02b | 0.07 ± 0.3b | 0.06 ± 0.01b | 0.04 ± 0.01a |
| Epicatechin (mg/g CBS)             | 0.08 ± 0.01a | 0.2 ± 0.02b | 0.1 ± 0.03b  | 0.1 ± 0.01b | 0.1 ± 0.01b  | 0.07 ± 0.01a |
| Theobromine (mg/g CBS)             | 1.6 ± 0.01a  | 6.3 ± 0.1b  | 7.7 ± 0.1c   | 6.5 ± 0.1b  | 6.6 ± 0.2b   | 5.8 ± 0.1b   |
| Caffeine (mg/g CBS)                | 0.9 ± 0.01a  | 1.3 ± 0.01a | 1.4 ± 0.01a  | 1.1 ± 0.1a  | 0.9 ± 0.1a   | 0.9 ± 0.01a  |

TE: Trolox equivalent; GAE: Gallic acid equivalent; CE: Catechin equivalent; EE: Escin equivalent. The means followed by different letters within a file means statistic differences ( $p < 0.05$ ) by Tukey's test.

**Table S2.** Values of different bioactive compounds analysed in broths at pH 3.

| Component                          | 0 min        | 3 min        | 5 min        | 7 min        | 10 min       | 13 min       |
|------------------------------------|--------------|--------------|--------------|--------------|--------------|--------------|
| Antioxidant activity (µM TE/g CBS) | 45.7 ± 0.7a  | 111.1 ± 1.3b | 114.9 ± 2.1b | 124.2 ± 1.9b | 118.1 ± 2.4b | 112.5 ± 1.6b |
| TPC (mg GAE/g CBS)                 | 4.8 ± 0.1a   | 7.6 ± 0.7b   | 7.7 ± 0.1b   | 8.2 ± 0.4b   | 9.6 ± 0.1c   | 9.8 ± 0.3c   |
| TFC (mg CE/g CBS)                  | 1.9 ± 0.1a   | 4.4 ± 0.4b   | 3.9 ± 0.1b   | 5.1 ± 0.1c   | 6.1 ± 0.2d   | 5.6 ± 0.01c  |
| TTC (mg CE/g CBS)                  | 1.3 ± 0.01a  | 3.2 ± 0.1b   | 2.9 ± 0.2b   | 4.5 ± 0.2c   | 4.6 ± 0.1c   | 4.2 ± 0.01c  |
| TSC (mg EE/g CBS)                  | 13.7 ± 0.7a  | 31.5 ± 0.6b  | 30.9 ± 0.9b  | 29.1 ± 0.6b  | 29.4 ± 0.9b  | 29.6 ± 0.6b  |
| Catechin (mg/g CBS)                | 0.07 ± 0.01a | 0.08 ± 0.01a | 0.07 ± 0.01a | 0.1 ± 0.01a  | 0.08 ± 0.01a | 0.08 ± 0.01a |
| Epicatechin (mg/g CBS)             | 0.04 ± 0.01a | 0.05 ± 0.01a | 0.05 ± 0.01a | 0.1 ± 0.01b  | 0.1 ± 0.01b  | 0.07 ± 0.02c |
| Theobromine (mg/g CBS)             | 1.6 ± 0.1a   | 5.6 ± 0.2b   | 7.2 ± 0.1c   | 8.8 ± 0.4d   | 8.2 ± 0.2d   | 7.3 ± 0.01c  |
| Caffeine (mg/g CBS)                | 0.7 ± 0.01a  | 1.1 ± 0.01b  | 1.2 ± 0.01b  | 1.1 ± 0.01b  | 1.5 ± 0.01c  | 1.7 ± 0.1c   |

TE: Trolox equivalent; GAE: Gallic acid equivalent; CE: Catechin equivalent; EE: Escin equivalent. The means followed by different letters within a file means statistic differences ( $p < 0.05$ ) by Tukey's test.

**Table S3.** Values of different bioactive compounds analysed in broths at pH 4.

| Component                          | 0 min        | 3 min        | 5 min        | 7 min        | 10 min       | 13 min       |
|------------------------------------|--------------|--------------|--------------|--------------|--------------|--------------|
| Antioxidant activity (µM TE/g CBS) | 46.9 ± 1.2a  | 119.3 ± 2.3b | 137.6 ± 1.4c | 159.9 ± 1.6d | 187.3 ± 2.2e | 152.8 ± 2.8d |
| TPC (mg GAE/g CBS)                 | 4.1 ± 0.1a   | 10.1 ± 0.7b  | 13.7 ± 0.9b  | 14.3 ± 0.4b  | 14.5 ± 1.7   | 13.3 ± 0.6b  |
| TFC (mg CE/g CBS)                  | 2.3 ± 0.01a  | 5.2 ± 0.1b   | 7.1 ± 0.4c   | 8.4 ± 0.1d   | 8.3 ± 0.6d   | 7.9 ± 0.1d   |
| TTC (mg CE/g CBS)                  | 1.5 ± 0.1a   | 4.5 ± 0.1b   | 4.6 ± 0.1b   | 4.8 ± 0.1b   | 6.3 ± 0.2c   | 5.9 ± 0.2c   |
| TSC (mg EE/g CBS)                  | 17.1 ± 0.8a  | 37.3 ± 0.9b  | 45.6 ± 0.9c  | 42.8 ± 0.9c  | 52.5 ± 1.8d  | 50.1 ± 1.4d  |
| Catechin (mg/g CBS)                | 0.02 ± 0.01a | 0.03 ± 0.01a | 0.1 ± 0.01b  | 0.2 ± 0.01b  | 0.2 ± 0.01b  | 0.2 ± 0.01b  |
| Epicatechin (mg/g CBS)             | 0.04 ± 0.0a  | 0.1 ± 0.01b  | 0.07 ± 0.01c | 0.1 ± 0.01b  | 0.3 ± 0.01d  | 0.2 ± 0.1b   |
| Theobromine (mg/g CBS)             | 0.9 ± 0.1a   | 5.3 ± 0.1b   | 6.9 ± 0.4c   | 7.1 ± 0.6d   | 7.3 ± 0.9d   | 9.4 ± 0.2e   |
| Caffeine (mg/g CBS)                | 1.8 ± 0.01a  | 2.5 ± 0.1a   | 3.4 ± 0.1b   | 3.5 ± 0.1b   | 3.5 ± 0.1b   | 3.5 ± 0.1b   |

TE: Trolox equivalent; GAE: Gallic acid equivalent; CE: Catechin equivalent; EE: Escin equivalent. The means followed by different letters within a file means statistic differences ( $p < 0.05$ ) by Tukey's test.

**Table S4.** Values of different bioactive compounds analysed in broths at pH 5.

| Component                                          | 0 min           | 3 min            | 5 min            | 7 min            | 10 min           | 13 min           |
|----------------------------------------------------|-----------------|------------------|------------------|------------------|------------------|------------------|
| Antioxidant activity<br>( $\mu\text{M TE/g CBS}$ ) | 27.9 $\pm$ 2.1a | 102.9 $\pm$ 3.1b | 118.2 $\pm$ 1.9c | 133.9 $\pm$ 1.7d | 136.5 $\pm$ 3.3d | 134.3 $\pm$ 1.6d |
| TPC (mg GAE/g CBS)                                 | 4.1 $\pm$ 0.2a  | 9.1 $\pm$ 0.6b   | 10.1 $\pm$ 1.2b  | 10.9 $\pm$ 1.1b  | 11.3 $\pm$ 1.6b  | 12.1 $\pm$ 1.1c  |
| TFC (mg CE/g CBS)                                  | 1.2 $\pm$ 0.05a | 5.8 $\pm$ 0.1b   | 5.5 $\pm$ 0.2b   | 6.7 $\pm$ 0.4b   | 8.9 $\pm$ 0.4c   | 10.1 $\pm$ 0.9d  |
| TTC (mg CE/g CBS)                                  | 1.3 $\pm$ 0.01a | 3.6 $\pm$ 0.0b   | 3.8 $\pm$ 0.3b   | 4.3 $\pm$ 0.1b   | 6.1 $\pm$ 0.5c   | 6.5 $\pm$ 0.4c   |
| TSC (mg EE/g CBS)                                  | 14.3 $\pm$ 1.6a | 30.9 $\pm$ 1.1b  | 28.3 $\pm$ 0.9b  | 30.4 $\pm$ 1.5b  | 42.1 $\pm$ 1.8b  | 43.2 $\pm$ 2.1b  |
| Catechin (mg/g CBS)                                | n.d.            | 0.03 $\pm$ 0.01a | 0.05 $\pm$ 0.01a | 0.05 $\pm$ 0.01a | 0.06 $\pm$ 0.01b | 0.06 $\pm$ 0.0b  |
| Epicatechin (mg/g CBS)                             | n.d.            | 0.03 $\pm$ 0.01a | 0.03 $\pm$ 0.01a | 0.03 $\pm$ 0.01a | 0.06 $\pm$ 0.02b | 0.05 $\pm$ 0.0b  |
| Theobromine (mg/g CBS)                             | 1.4 $\pm$ 0.05a | 6.2 $\pm$ 0.9b   | 5.7 $\pm$ 0.4c   | 4.7 $\pm$ 0.2c   | 4.3 $\pm$ 0.1cd  | 4.7 $\pm$ 0.4c   |
| Caffeine (mg/g CBS)                                | 1.1 $\pm$ 0.1a  | 1.3 $\pm$ 0.05a  | 1.4 $\pm$ 0.01b  | 1.5 $\pm$ 0.01b  | 1.7 $\pm$ 0.1c   | 1.8 $\pm$ 0.1c   |

TE: Trolox equivalent; GAE: Gallic acid equivalent; CE: Catechin equivalent; EE: Escin equivalent; n.d. Non detected. The means followed by different letters within a file means statistic differences ( $p < 0.05$ ) by Tukey's test.

**Table S5.** Values of different bioactive compounds analysed in broths at pH 8.

| Component                                          | 0 min           | 3 min            | 5 min            | 7 min            | 10 min           | 13 min           |
|----------------------------------------------------|-----------------|------------------|------------------|------------------|------------------|------------------|
| Antioxidant activity<br>( $\mu\text{M TE/g CBS}$ ) | 52.1 $\pm$ 2.5a | 120.4 $\pm$ 1.9b | 132.9 $\pm$ 2.6c | 155.3 $\pm$ 2.4d | 153.8 $\pm$ 1.7d | 143.8 $\pm$ 2.8e |
| TPC (mg GAE/g CBS)                                 | 5.1 $\pm$ 0.2a  | 11.5 $\pm$ 0.8b  | 14.4 $\pm$ 1.7b  | 14.4 $\pm$ 0.9b  | 14.6 $\pm$ 0.5b  | 13.7 $\pm$ 0.9b  |
| TFC (mg CE/g CBS)                                  | 2.3 $\pm$ 0.1a  | 4.6 $\pm$ 0.1b   | 5.2 $\pm$ 0.5b   | 6.1 $\pm$ 0.2c   | 5.7 $\pm$ 0.1c   | 7.5 $\pm$ 0.3d   |
| TTC (mg CE/g CBS)                                  | 1.5 $\pm$ 0.05a | 4.5 $\pm$ 0.2b   | 4.3 $\pm$ 0.1b   | 4.7 $\pm$ 0.2b   | 5.1 $\pm$ 0.3b   | 4.9 $\pm$ 0.1b   |
| TSC (mg EE/g CBS)                                  | 14.6 $\pm$ 1.6a | 40.9 $\pm$ 1.6b  | 41.5 $\pm$ 1.1b  | 41.8 $\pm$ 1.7b  | 40.8 $\pm$ 1.2b  | 40.8 $\pm$ 1.6b  |
| Catechin (mg/g CBS)                                | n.d.            | 0.04 $\pm$ 0.01a | 0.04 $\pm$ 0.01a | 0.05 $\pm$ 0.01a | 0.06 $\pm$ 0.01a | 0.05 $\pm$ 0.02a |
| Epicatechin (mg/g CBS)                             | n.d.            | 0.02 $\pm$ 0.0a  | 0.03 $\pm$ 0.01a | 0.03 $\pm$ 0.01a | 0.04 $\pm$ 0.01b | 0.05 $\pm$ 0.0b  |
| Theobromine (mg/g CBS)                             | 1.9 $\pm$ 0.1a  | 3.2 $\pm$ 0.2b   | 5.5 $\pm$ 0.1c   | 6.5 $\pm$ 0.6d   | 5.5 $\pm$ 0.01c  | 5.4 $\pm$ 1.2c   |
| Caffeine (mg/g CBS)                                | 0.7 $\pm$ 0.03a | 1.1 $\pm$ 0.01b  | 0.9 $\pm$ 0.01b  | 1.4 $\pm$ 0.01b  | 1.7 $\pm$ 0.0b   | 1.6 $\pm$ 0.2b   |

TE: Trolox equivalent; GAE: Gallic acid equivalent; CE: Catechin equivalent; EE: Escin equivalent. n.d. Non detected. The means followed by different letters within a file means statistic differences ( $p < 0.05$ ) by Tukey's test.

**Table S6.** Values of different bioactive compounds analysed in broths at pH 10.

| Component                                          | 0 min            | 3 min            | 5 min            | 7 min            | 10 min           | 13 min           |
|----------------------------------------------------|------------------|------------------|------------------|------------------|------------------|------------------|
| Antioxidant activity<br>( $\mu\text{M TE/g CBS}$ ) | 57.2 $\pm$ 1.3a  | 120.6 $\pm$ 4.1b | 148.8 $\pm$ 2.1b | 135.4 $\pm$ 1.9b | 131.5 $\pm$ 2.2b | 126.8 $\pm$ 3.1b |
| TPC (mg GAE/g CBS)                                 | 6.1 $\pm$ 0.2a   | 12.3 $\pm$ 1.1   | 11.5 $\pm$ 2.2b  | 10.3 $\pm$ 1.2c  | 10.6 $\pm$ 2.1c  | 10.3 $\pm$ 1.1c  |
| TFC (mg CE/g CBS)                                  | 4.1 $\pm$ 0.1a   | 4.5 $\pm$ 0.6a   | 5.6 $\pm$ 0.1b   | 5.3 $\pm$ 0.2b   | 5.8 $\pm$ 0.1b   | 5.1 $\pm$ 0.2b   |
| TTC (mg CE/g CBS)                                  | 2.6 $\pm$ 0.01a  | 3.9 $\pm$ 0.2b   | 4.4 $\pm$ 0.1bc  | 4.9 $\pm$ 0.1c   | 3.9 $\pm$ 1.1bc  | 3.5 $\pm$ 0.6ab  |
| TSC (mg EE/g CBS)                                  | 17.6 $\pm$ 0.9a  | 36.4 $\pm$ 1.8b  | 39.8 $\pm$ 1.9bc | 35.6 $\pm$ 2.5bd | 33.5 $\pm$ 1.9e  | 29.5 $\pm$ 1.8f  |
| Catechin (mg/g CBS)                                | 0.02 $\pm$ 0.0a  | 0.03 $\pm$ 0.01a | 0.07 $\pm$ 0.01b | 0.07 $\pm$ 0.02b | 0.08 $\pm$ 0.0b  | 0.07 $\pm$ 0.03b |
| Epicatechin (mg/g CBS)                             | 0.05 $\pm$ 0.01a | 0.06 $\pm$ 0.0ab | 0.06 $\pm$ 0.02b | 0.07 $\pm$ 0.01b | 0.09 $\pm$ 0.01c | 0.06 $\pm$ 0.01b |
| Theobromine (mg/g CBS)                             | 1.9 $\pm$ 0.4a   | 4.6 $\pm$ 0.6b   | 4.9 $\pm$ 0.6b   | 6.2 $\pm$ 0.6c   | 7.1 $\pm$ 0.5d   | 6.9 $\pm$ 0.5cd  |
| Caffeine (mg/g CBS)                                | 1.1 $\pm$ 0.2a   | 1.2 $\pm$ 0.1b   | 1.3 $\pm$ 0.1b   | 1.3 $\pm$ 0.2b   | 1.4 $\pm$ 0.3c   | 1.9 $\pm$ 0.01d  |

TE: Trolox equivalent; GAE: Gallic acid equivalent; CE: Catechin equivalent; EE: Escin equivalent. The means followed by different letters within a file means statistic differences ( $p < 0.05$ ) by Tukey's test.
